# Supplementary material for: A facile approach for the synthesis of C13–C24 fragments of maltepolides A, C and D
Source: Royal Society of Chemistry journal article supplement (doi:10.1039/c6ob01447j), 2016-01-01

## **A facile approach for the synthesis of C13-C24 fragment of maltepolides A, C and D**

**P. Sankara Rao<sup>a</sup> and P. Srihari<sup>\*a</sup>**

### **Supporting Information**

- 1) Mosher ester analysis
- 2) <sup>1</sup>H and <sup>13</sup>C NMR of new compounds

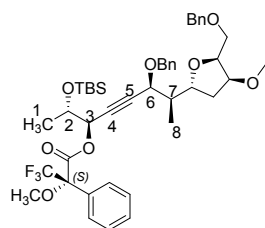

(*S*)-Mosher ester

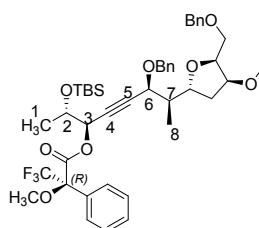

(*R*)-Mosher ester

**(*R*)-MTPA ester** : To a stirred solution of alcohol **8** (10 mg, 0.01 mmol), DCC (14 mg, 0.06 mmol) and DMAP (4 mg, 0.003 mmol) in CH<sub>2</sub>Cl<sub>2</sub> (1.0 mL) at rt was added (+)-(*R*)- $\alpha$ -methoxy- $\alpha$ -(trifluoromethyl)-phenylacetic acid (16 mg, 0.03 mmol) in one portion. After 10 h, the crude reaction mixture was purified directly by flash column chromatography (10% EtOAc/Hexanes) to provide (*R*)-MTPA ester (5 mg, 40%). <sup>1</sup>H NMR (500 MHz, CDCl<sub>3</sub>):  $\delta$  7.36–7.28 (m, 15H), 5.65–5.64 (dd,  $J$  = 2.8, 1.3 Hz, 1H), 4.69–4.66 (d,  $J$  = 11.7 Hz, 1H), 4.62–4.59 (d,  $J$  = 12 Hz, 1H), 4.53–4.50 (m, 3H), 4.20–4.15 (m, 1H), 4.10–4.04 (m, 1H), 3.91–3.88 (m, 1H), 3.92–3.89 (t,  $J$  = 3.5 Hz, 1H), 3.71–3.65 (dd,  $J$  = 10, 5.3 Hz, 1H), 3.59 (s, 3H), 3.29 (s, 3H), 2.16–2.13 (m, 1H), 1.82–1.78 (dd,  $J$  = 9.7, 6.7, 2.7 Hz, 1H), 1.52–1.50 (m, 1H), 1.22–1.20 (d,  $J$  = 6.1 Hz, 3H), 0.96–0.94 (d,  $J$  = 7.0 Hz, 3H), 0.86 (s, 9H), 0.08–0.07 (d,  $J$  = 4.5 Hz, 6H).

**(*S*)-MTPA ester**: To a stirred solution of alcohol **8** (10 mg, 0.01 mmol), DCC (14 mg, 0.06 mmol) and DMAP (4 mg, 0.003 mmol) in CH<sub>2</sub>Cl<sub>2</sub> (1.0 mL) at rt was added (–)-(*S*)- $\alpha$ -methoxy- $\alpha$ -(trifluoromethyl)-phenylacetic acid (16 mg, 0.03 mmol) in one portion. After 10 h, the crude reaction mixture was purified directly by flash column chromatography (10% EtOAc/Hexanes) to provide (*S*)-MTPA ester (4 mg, 26%). <sup>1</sup>H NMR (500 MHz, CDCl<sub>3</sub>):  $\delta$  7.35–7.27 (m, 15H), 5.58–5.57 (dd,  $J$  = 3.3, 1.2 Hz, 1H), 4.74–4.71 (d,  $J$  = 11.9 Hz, 1H), 4.62–4.52 (d,  $J$  = 12 Hz, 1H), 4.54–4.50 (m, 3H), 4.21–4.16 (m, 1H), 4.11–4.07 (m, 1H), 4.00–3.95 (m, 1H), 3.92–3.89 (t,  $J$  = 3.9 Hz, 1H), 3.71–3.67 (dd,  $J$  = 10, 5.1 Hz, 1H), 3.57 (s, 3H), 3.29 (s, 3H), 2.18–2.14 (m, 1H), 1.85–1.80 (dd,  $J$  = 8.3, 6.9, 3.0 Hz, 1H), 1.53–1.50 (m, 1H), 1.19–1.17 (d,  $J$  = 6.2 Hz, 3H), 0.99–0.97 (d,  $J$  = 7.0 Hz, 3H), 0.84 (s, 9H), 0.00–0.01 (d,  $J$  = 3.8 Hz, 6H).

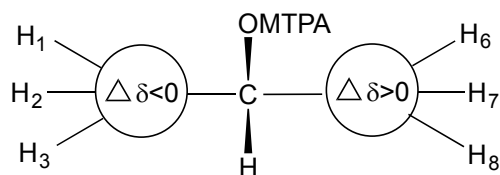

|                  | $\delta$ (ppm)<br>( <i>S</i> )-Mosher ester | $\delta$ (ppm)<br>( <i>R</i> )-Mosher ester | $\Delta\delta_{SR}$ ( $= \delta_S - \delta_R$ )<br>(500 MHz) |
|------------------|---------------------------------------------|---------------------------------------------|--------------------------------------------------------------|
| 1 <sup>1</sup> H | 1.19                                        | 1.22                                        | -0.03                                                        |
| 2 <sup>1</sup> H | 4.00                                        | 4.06                                        | -0.06                                                        |
| 3 <sup>1</sup> H | 5.58                                        | 5.65                                        | -0.07                                                        |
| 6 <sup>1</sup> H | 4.54                                        | 4.52                                        | +0.02                                                        |
| 7 <sup>1</sup> H | 2.18                                        | 2.16                                        | +0.02                                                        |
| 8 <sup>1</sup> H | 0.99                                        | 0.96                                        | +0.03                                                        |

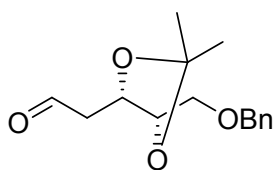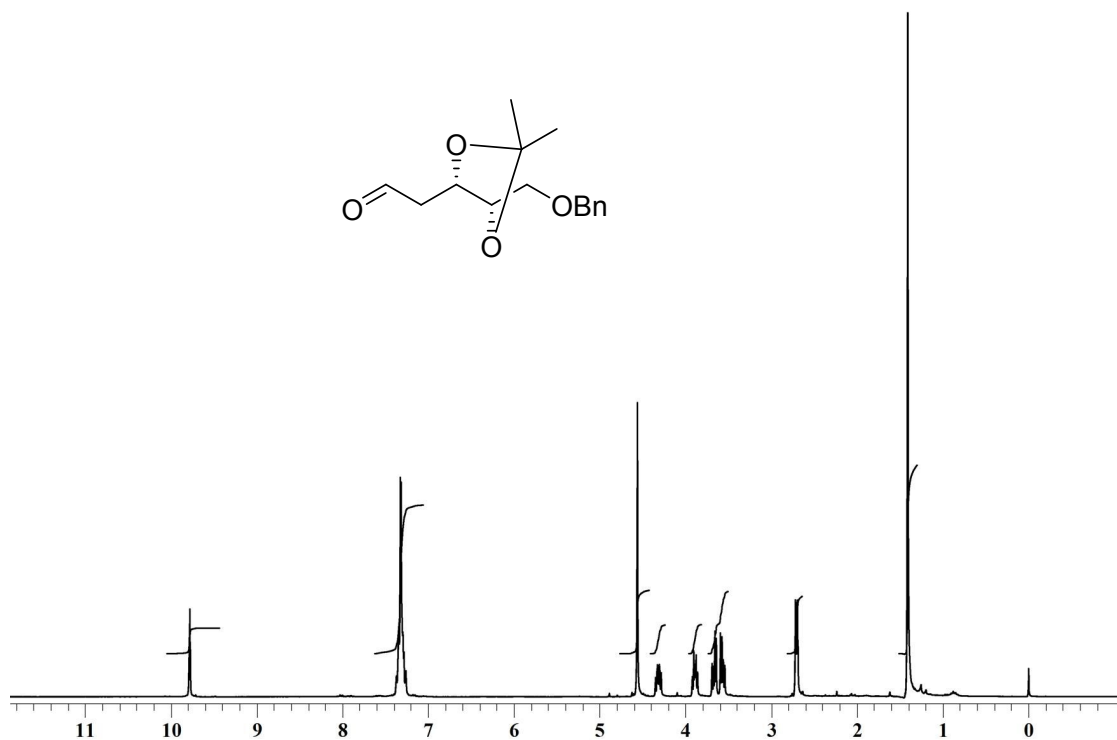

$^1\text{H}$  NMR OF COMPOUND 15 (300 MHz,  $\text{CDCl}_3$ )

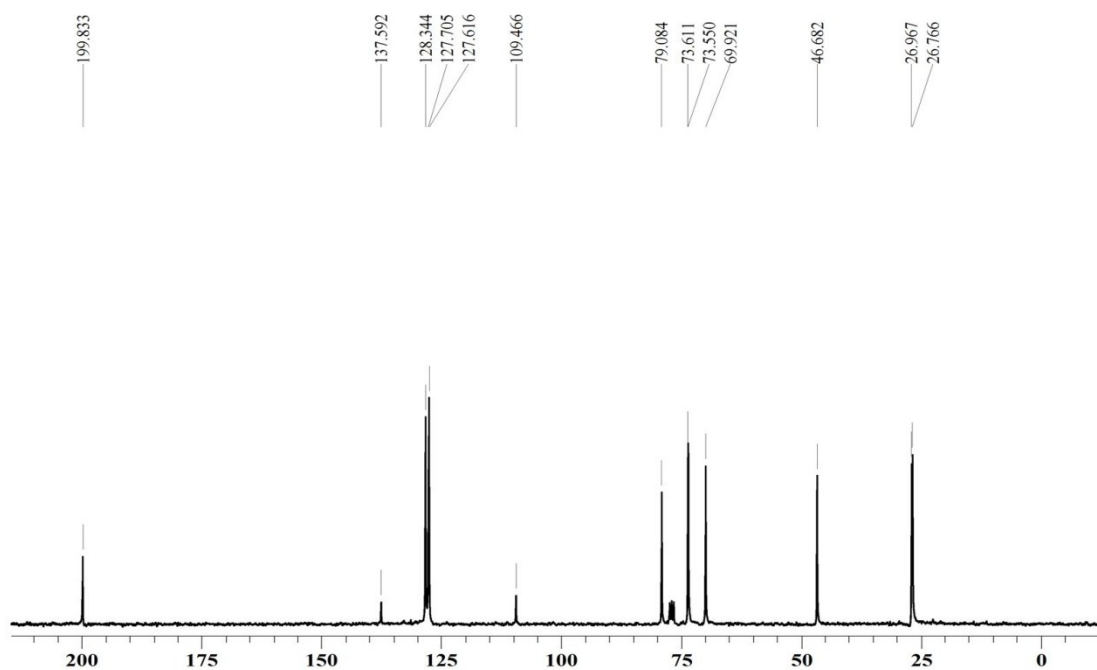

$^{13}\text{C}$  NMR OF COMPOUND 15 (75 MHz,  $\text{CDCl}_3$ )

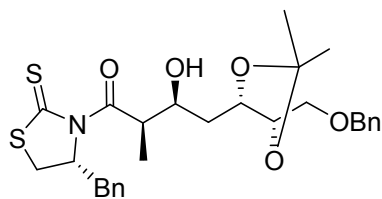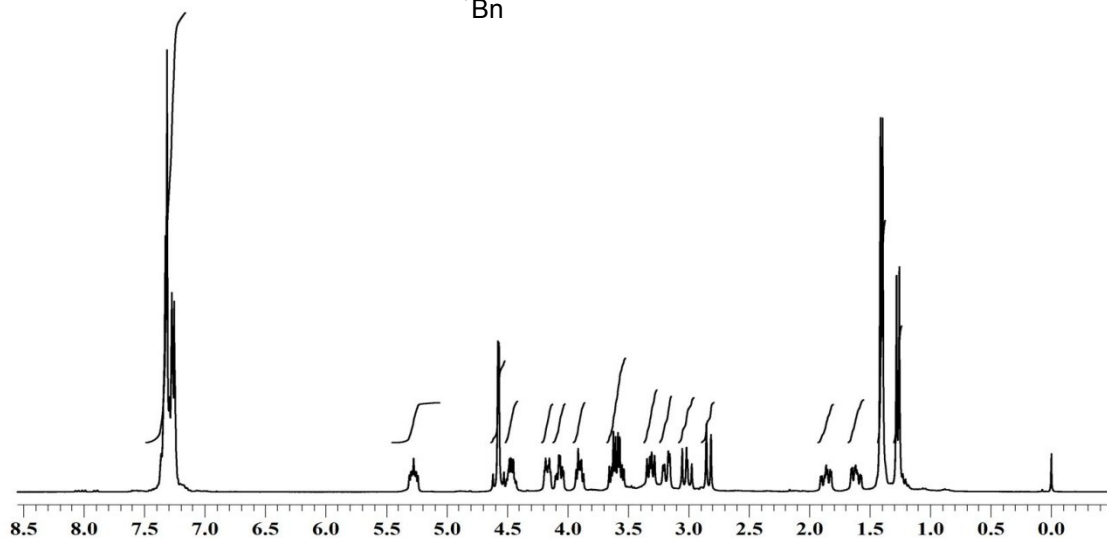

**$^1\text{H}$  NMR OF COMPOUND 19 (500 MHz,  $\text{CDCl}_3$ )**

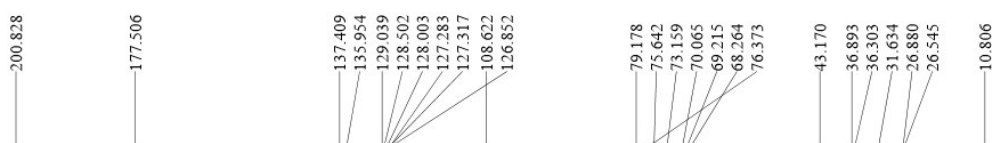

**$^{13}\text{C}$  NMR OF COMPOUND 19 (125 MHz,  $\text{CDCl}_3$ )**

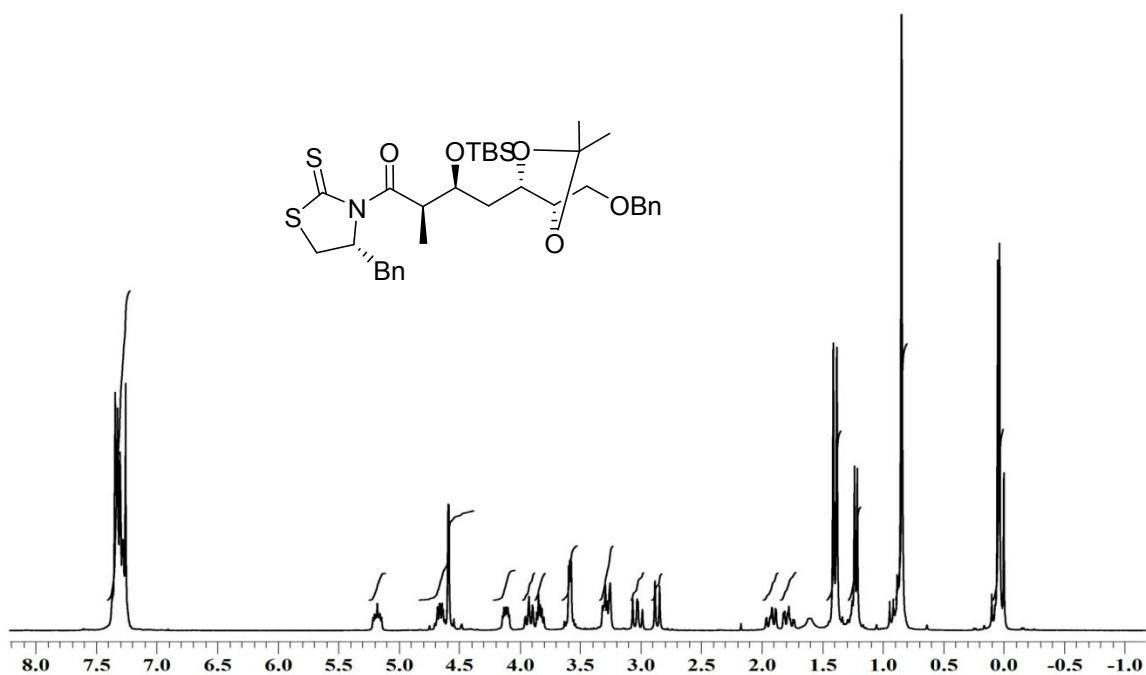

<sup>1</sup>H NMR OF COMPOUND 14 (300 MHz, CDCl<sub>3</sub>)

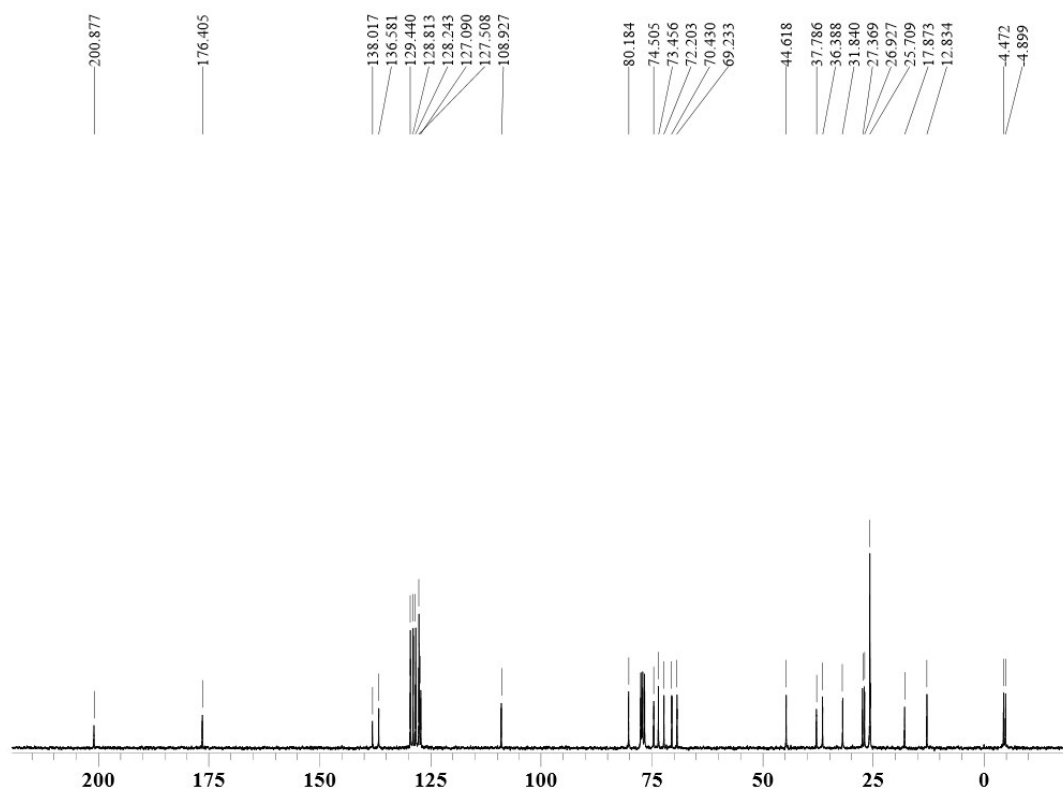

<sup>13</sup>C NMR OF COMPOUND 14 (75 MHz, CDCl<sub>3</sub>)

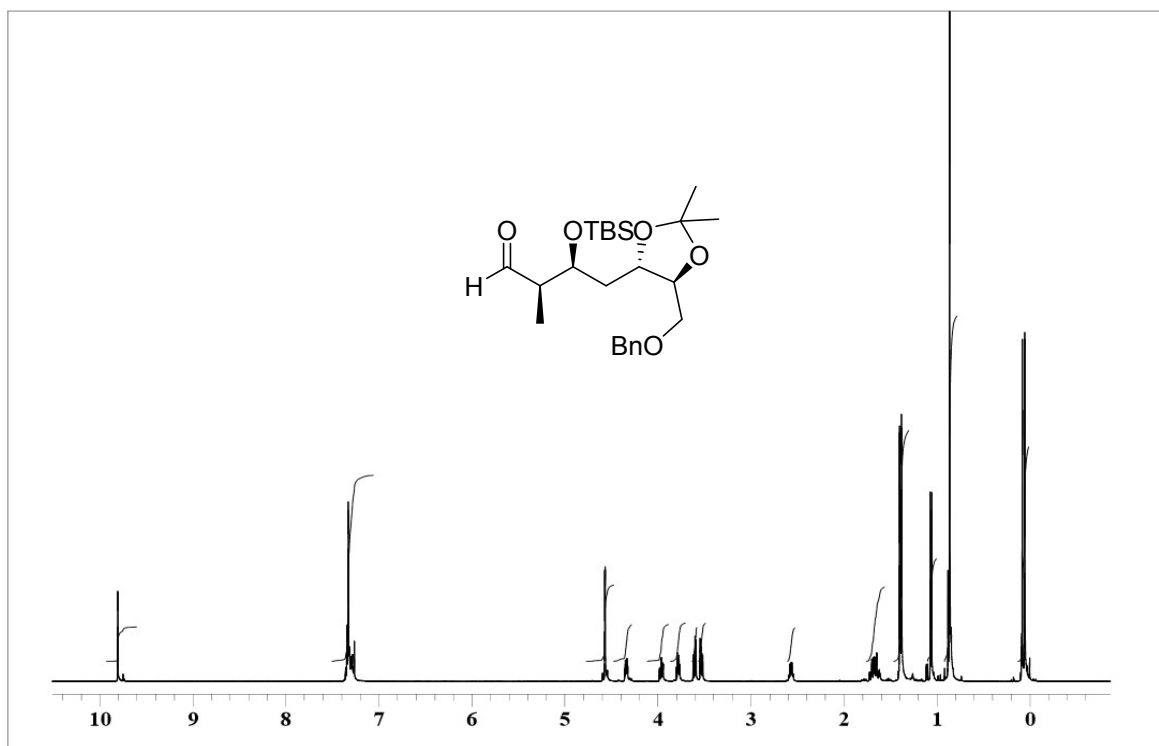

**<sup>1</sup>H NMR OF COMPOUND 22 (500 MHz, CDCl<sub>3</sub>)**

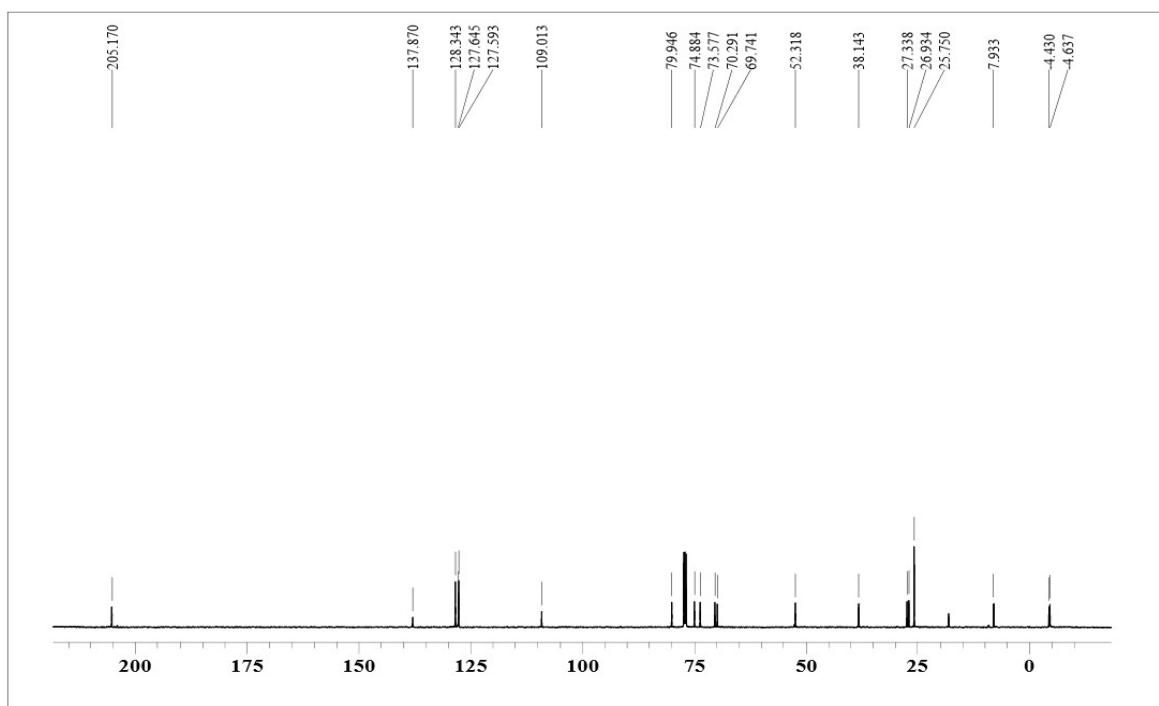

**<sup>13</sup>C NMR OF COMPOUND 22 (125 MHz, CDCl<sub>3</sub>)**

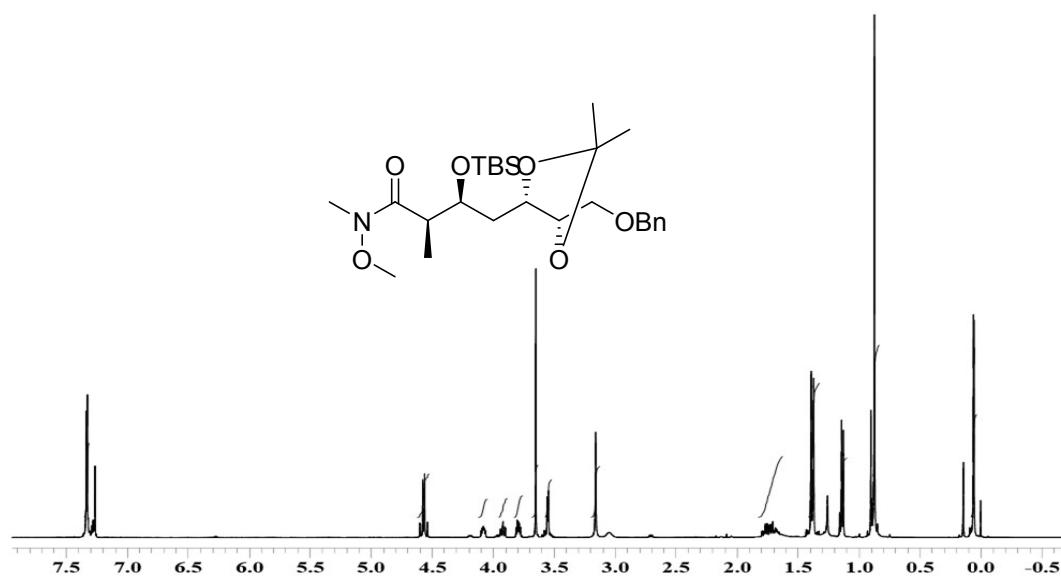

**<sup>1</sup>H NMR OF COMPOUND 20 (500 MHz, CDCl<sub>3</sub>)**

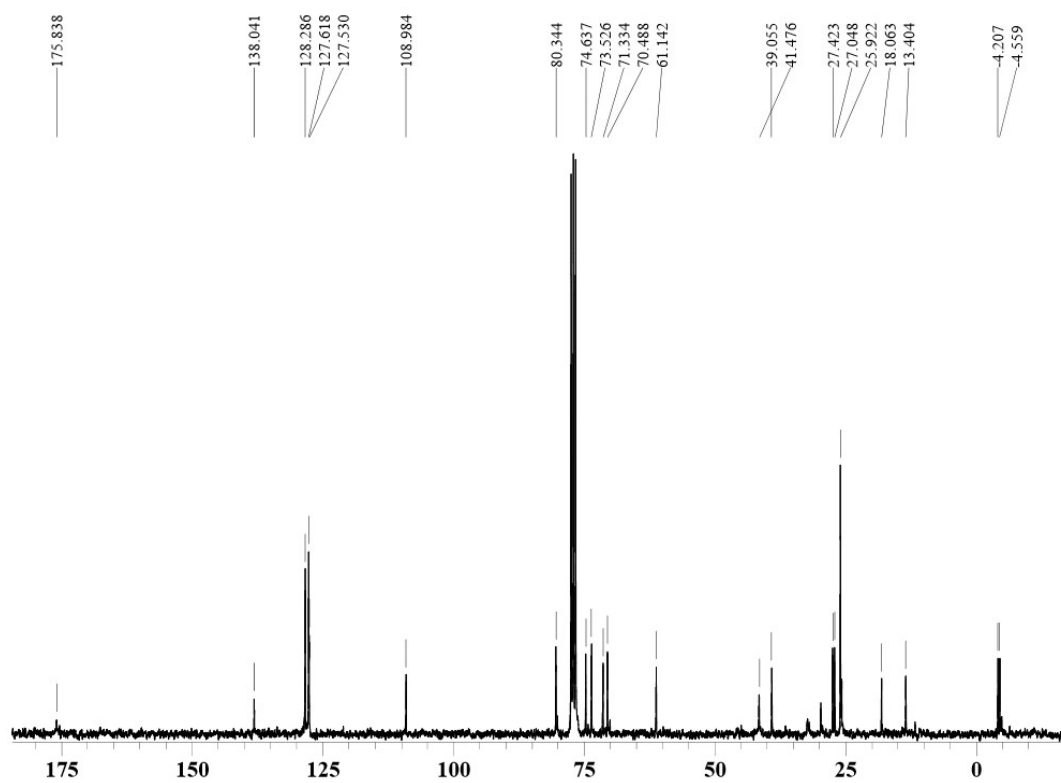

**<sup>13</sup>C NMR OF COMPOUND 20 (125 MHz, CDCl<sub>3</sub>)**

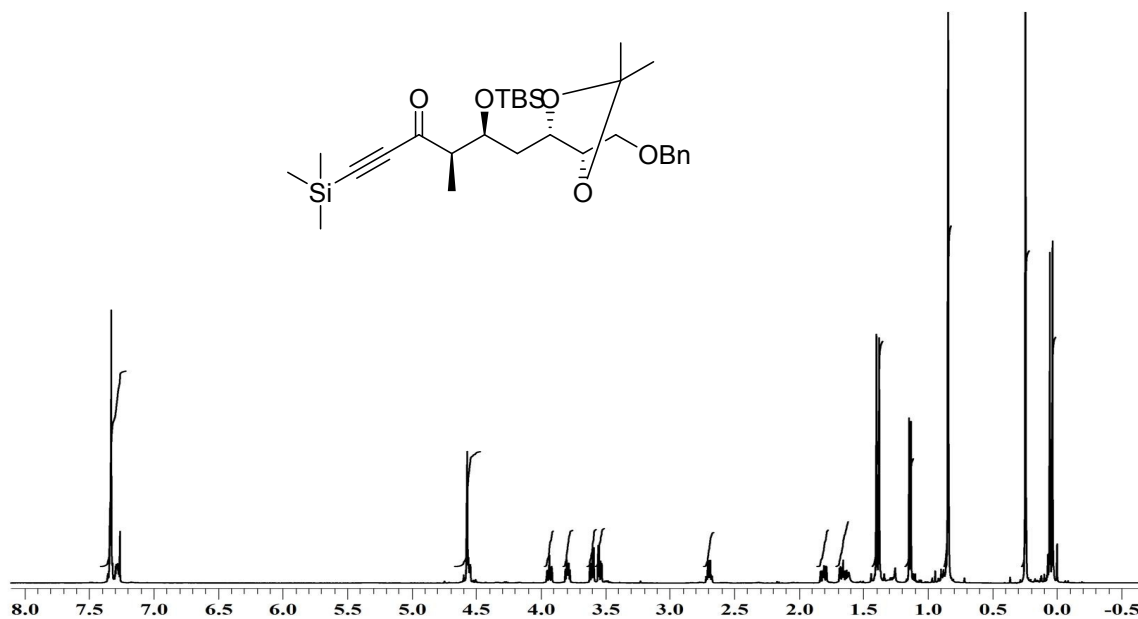

**<sup>1</sup>H NMR OF COMPOUND 13 (500 MHz, CDCl<sub>3</sub>)**

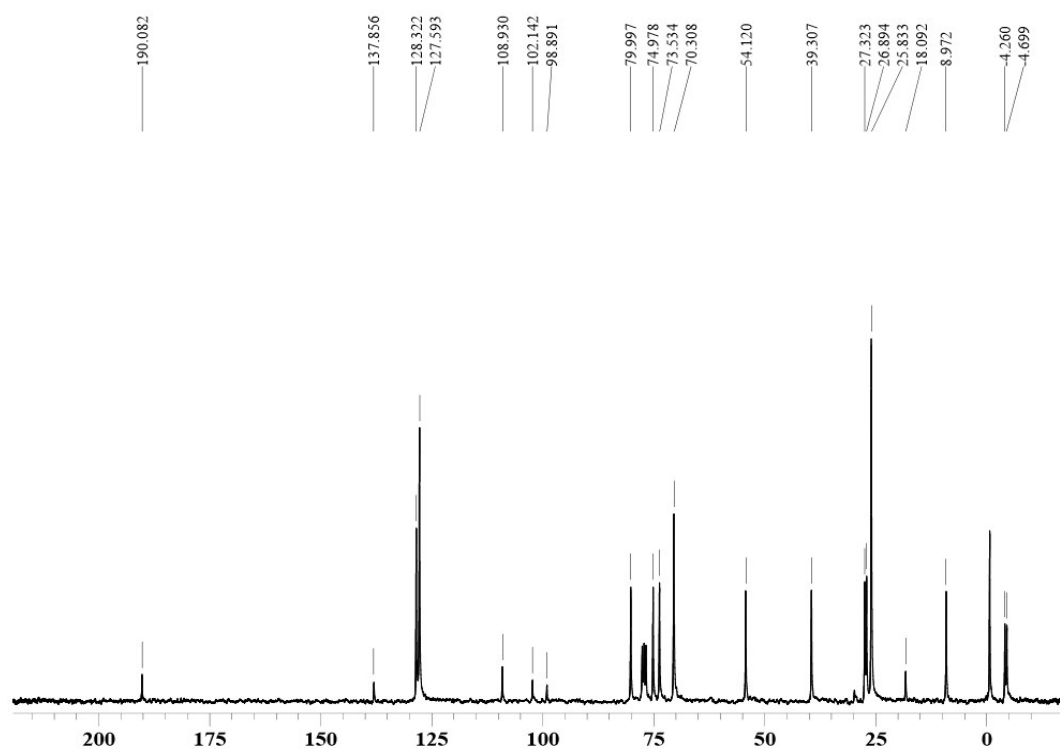

**<sup>13</sup>C NMR OF COMPOUND 13 (125 MHz, CDCl<sub>3</sub>)**



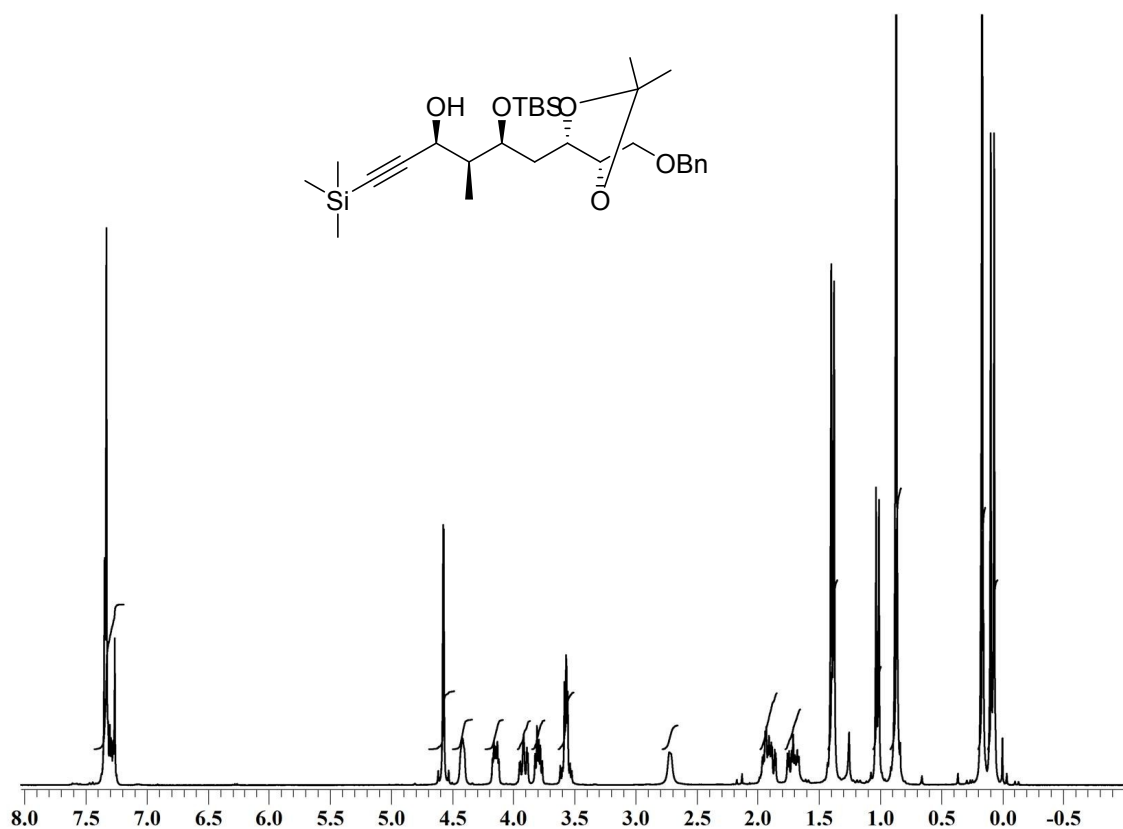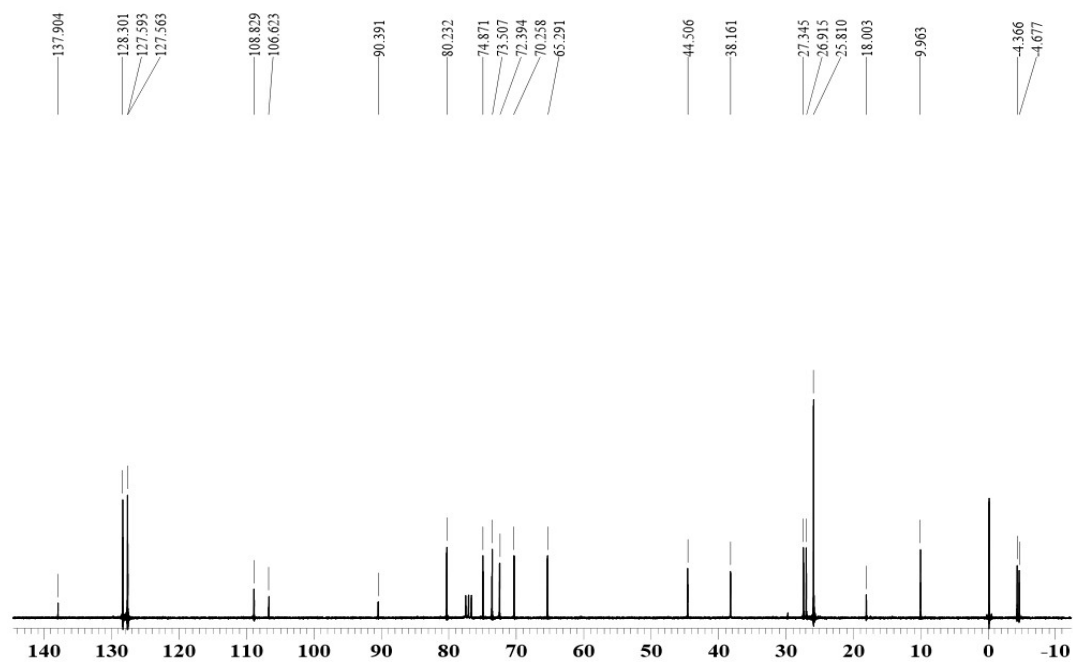

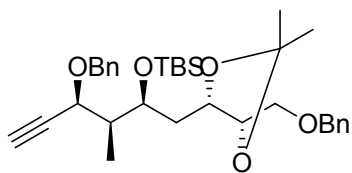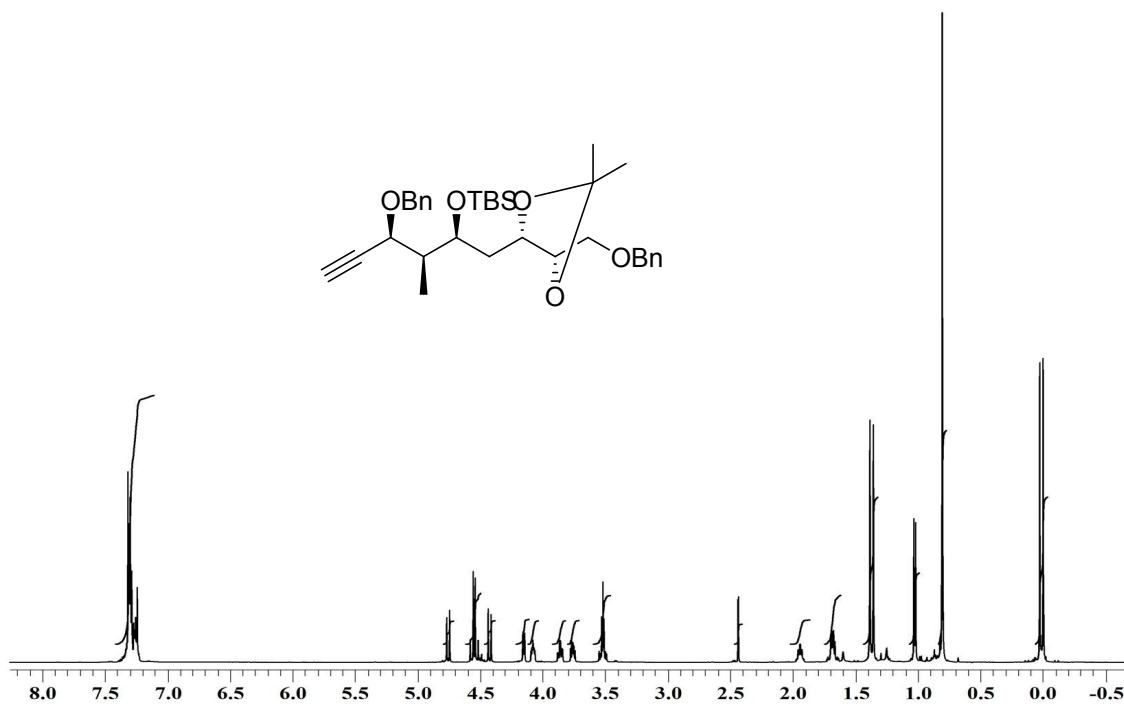

**$^1\text{H}$  NMR OF COMPOUND 26 (500 MHz,  $\text{CDCl}_3$ )**

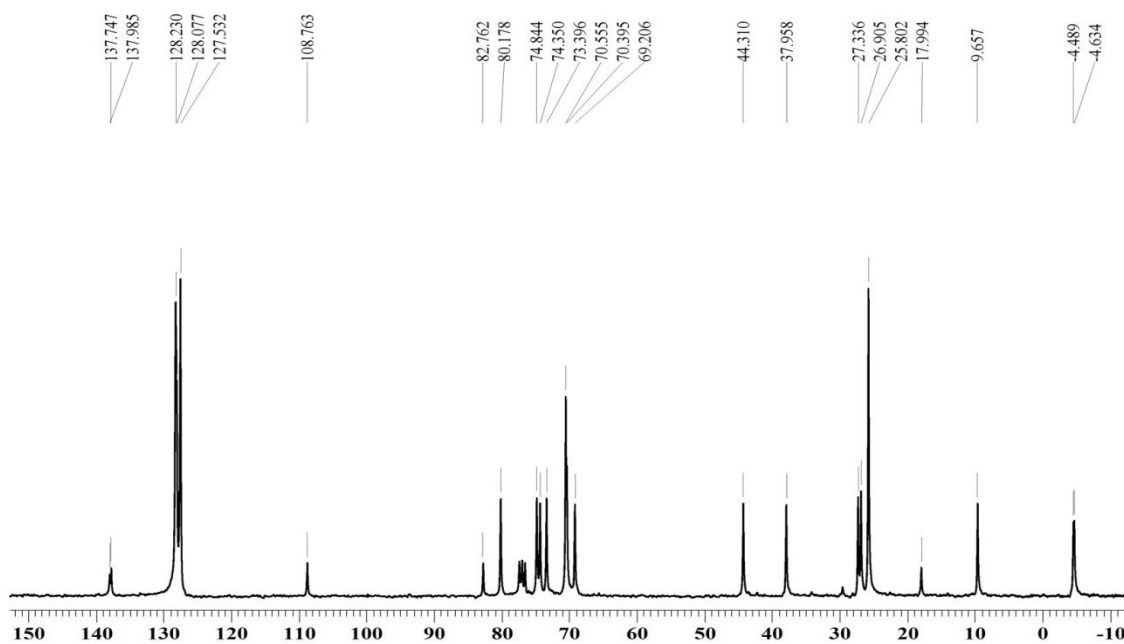

**$^{13}\text{C}$  NMR OF COMPOUND 26 (125 MHz,  $\text{CDCl}_3$ )**

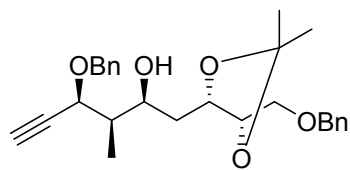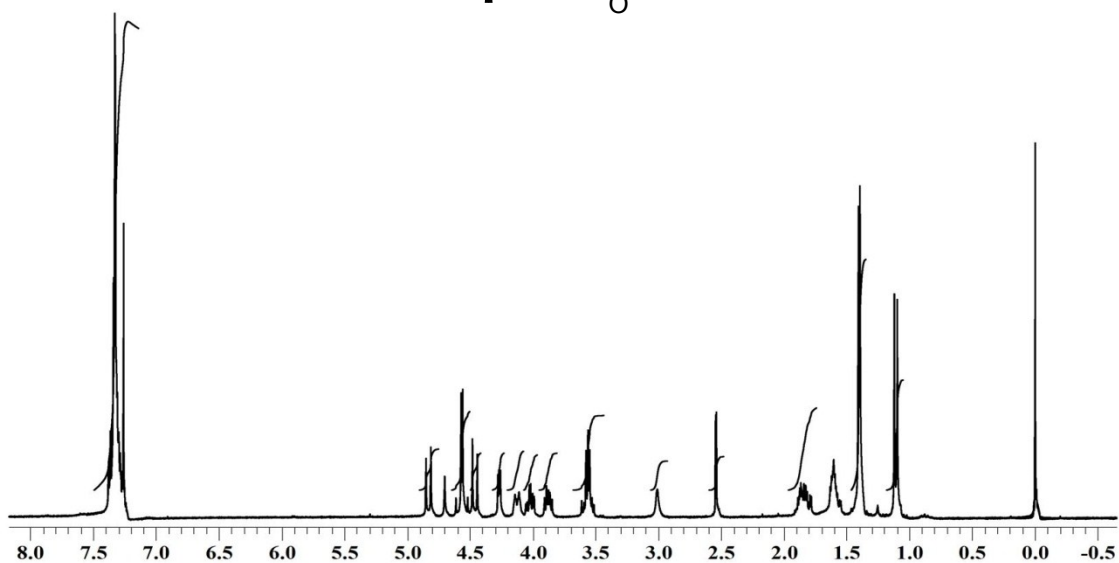

**$^1\text{H}$  NMR OF COMPOUND 27 (500 MHz,  $\text{CDCl}_3$ )**

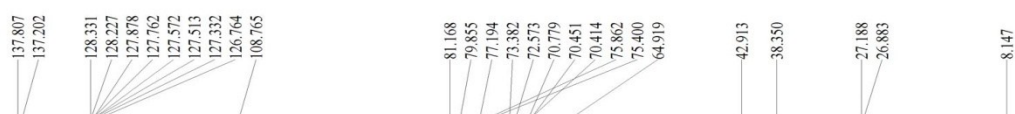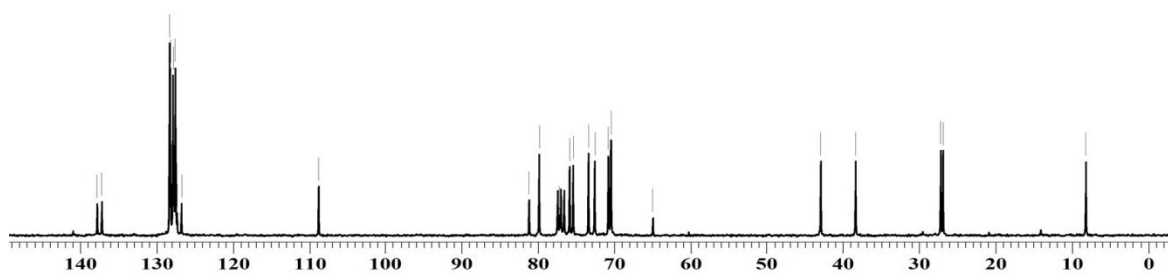

**$^{13}\text{C}$  NMR OF COMPOUND 27 (125 MHz,  $\text{CDCl}_3$ )**

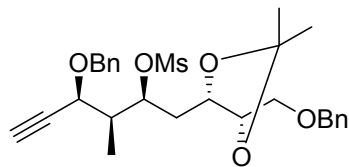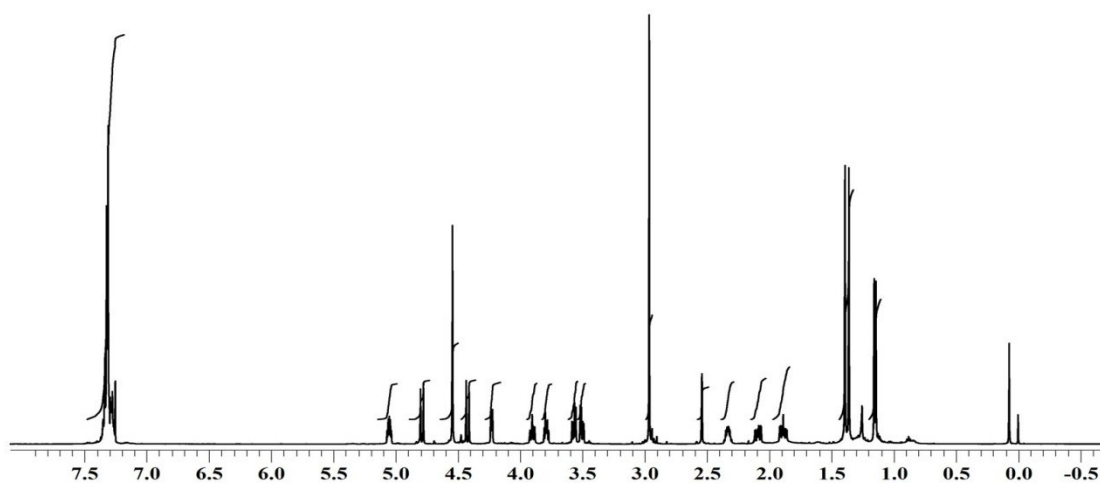

**<sup>1</sup>H NMR OF COMPOUND 12 (500 MHz, CDCl<sub>3</sub>)**

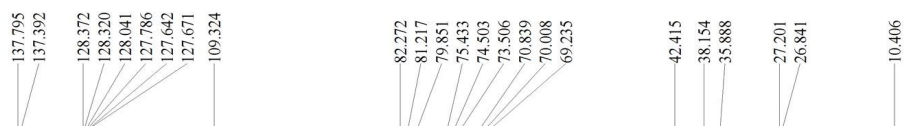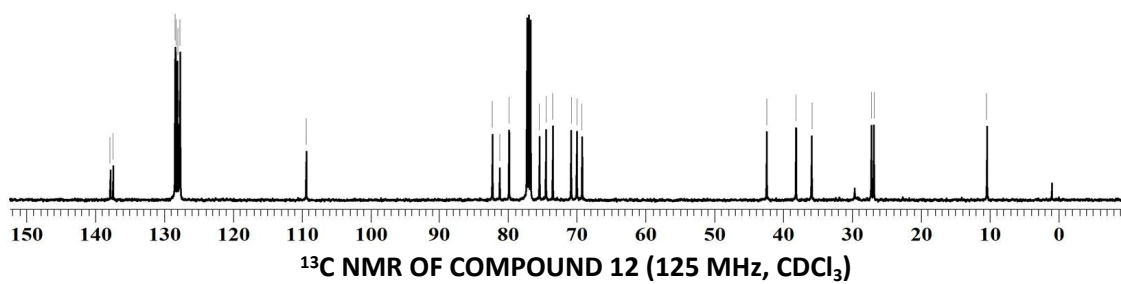

**<sup>13</sup>C NMR OF COMPOUND 12 (125 MHz, CDCl<sub>3</sub>)**

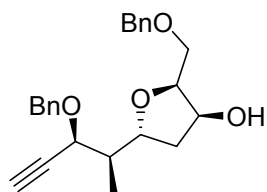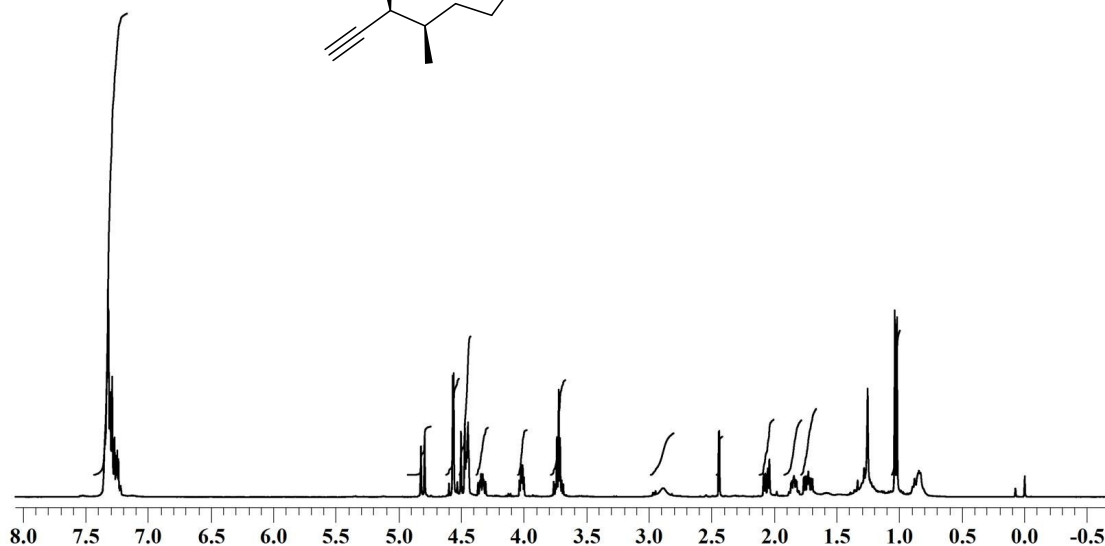

**<sup>1</sup>H NMR OF COMPOUND 28 (500 MHz, CDCl<sub>3</sub>)**

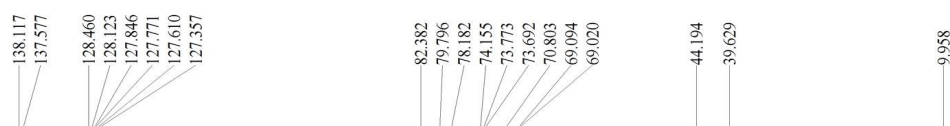

**<sup>13</sup>C NMR OF COMPOUND 28 (125 MHz, CDCl<sub>3</sub>)**

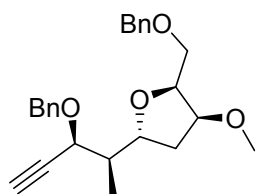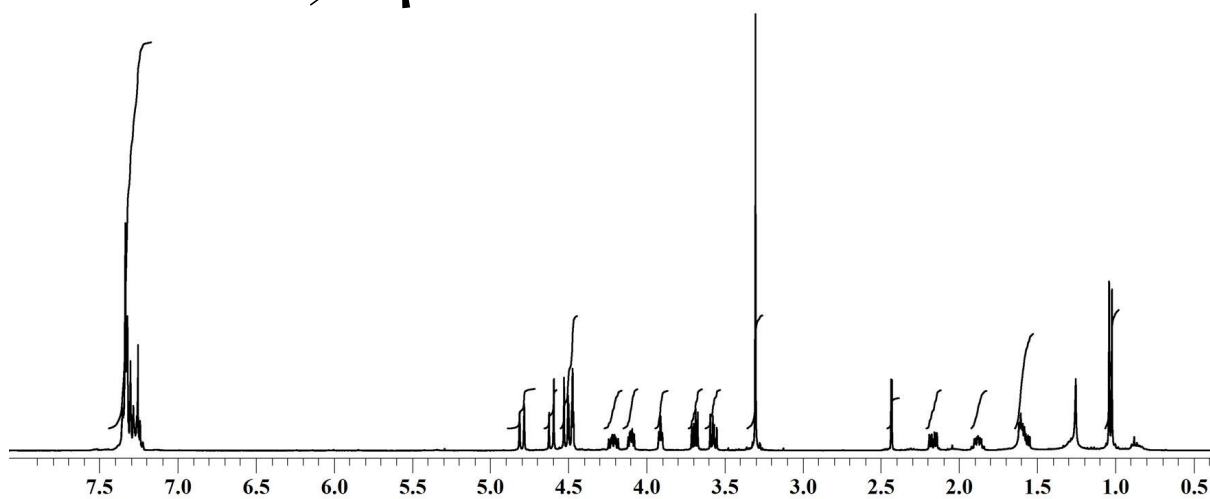

**<sup>1</sup>H NMR OF COMPOUND 10 (400 MHz, CDCl<sub>3</sub>)**

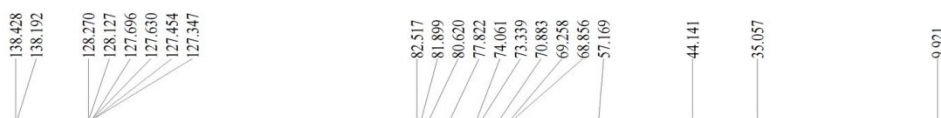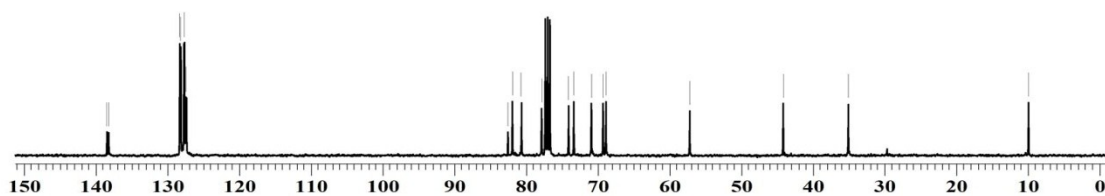

**<sup>13</sup>C NMR OF COMPOUND 10 (100 MHz, CDCl<sub>3</sub>)**

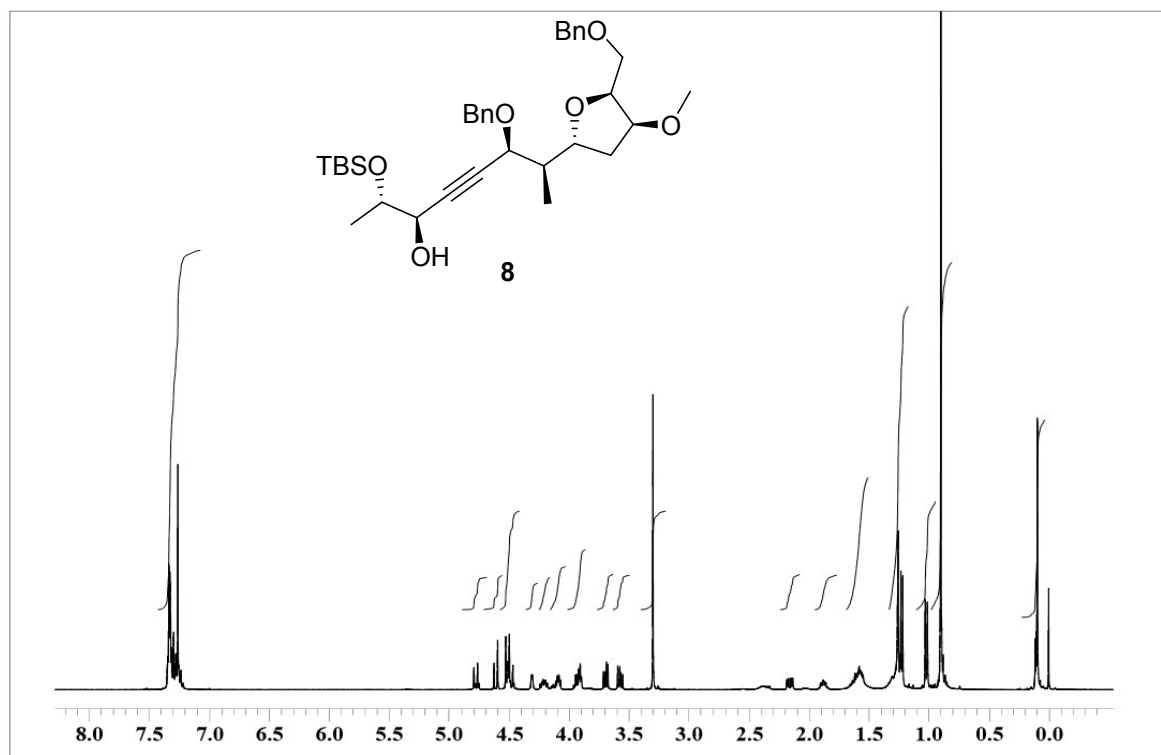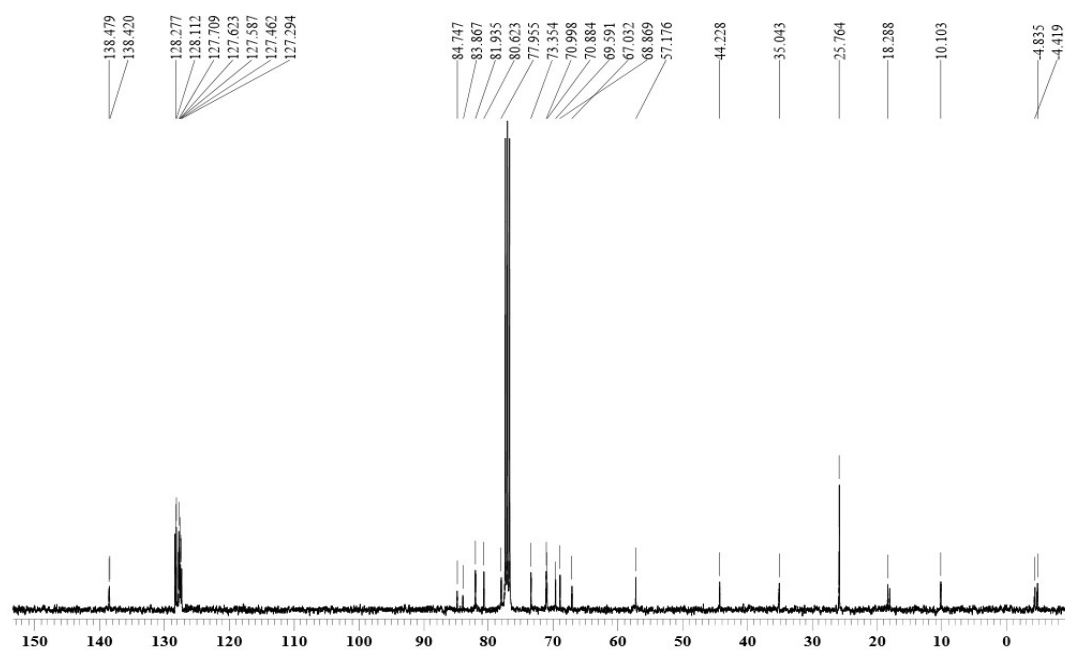

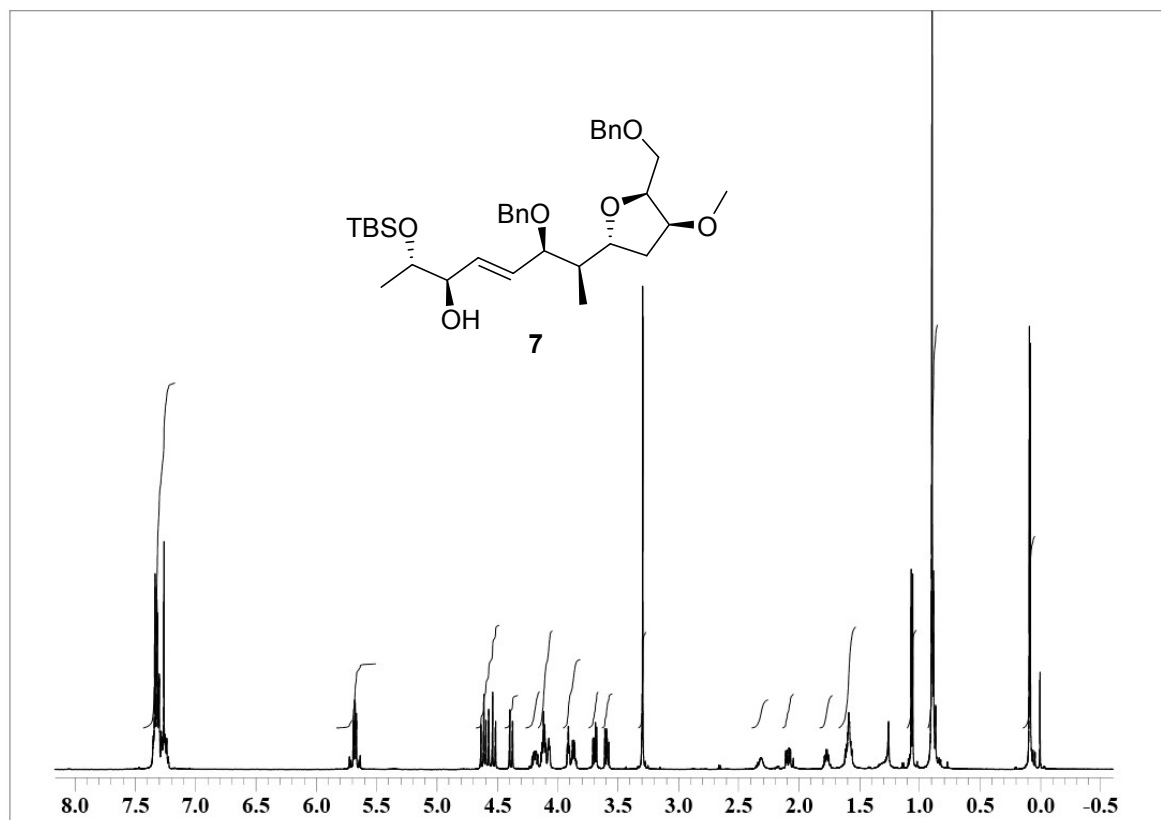

<sup>1</sup>H NMR OF COMPOUND 7 (500 MHz, CDCl<sub>3</sub>)

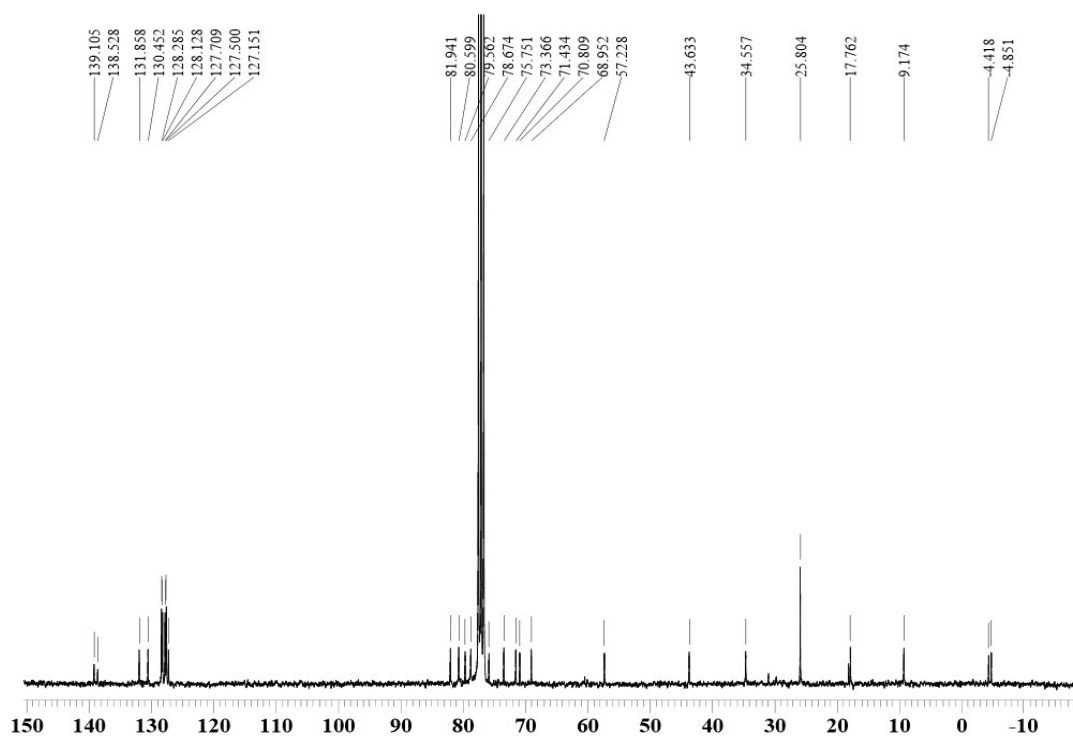

<sup>13</sup>C NMR OF COMPOUND 7 (125 MHz, CDCl<sub>3</sub>)



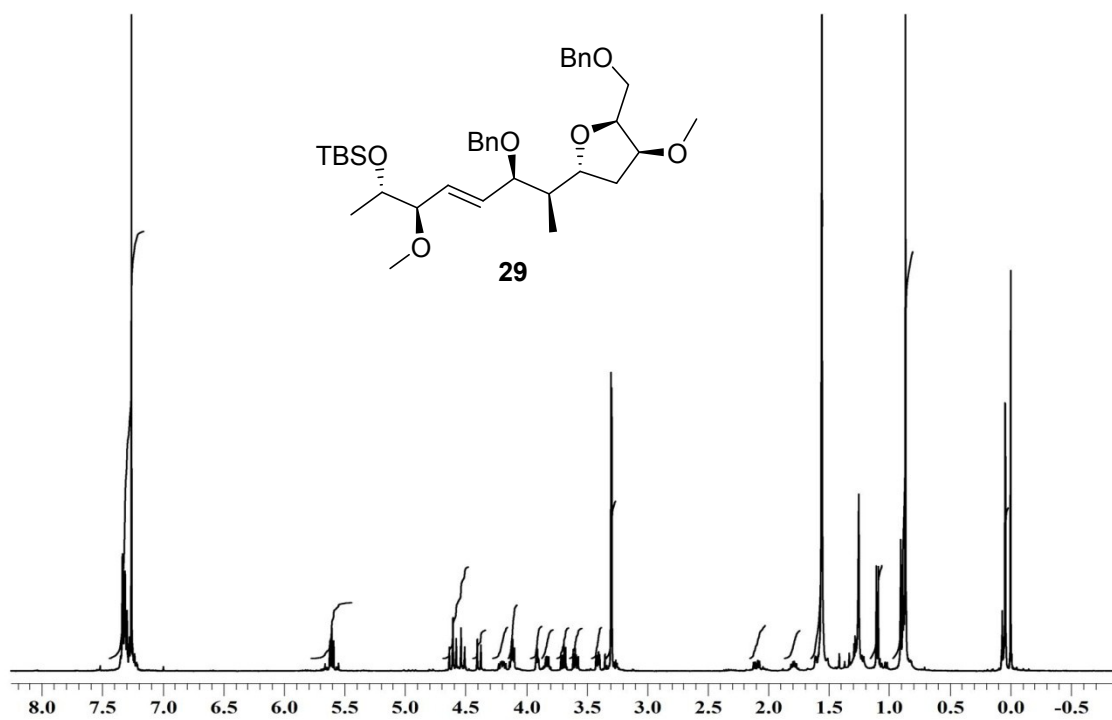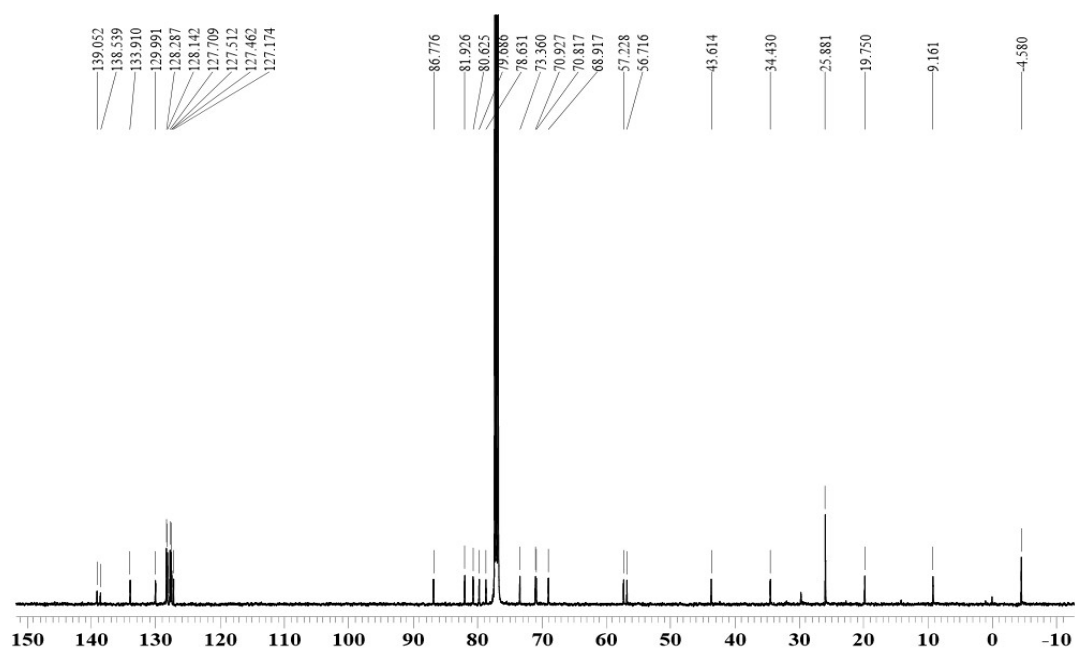

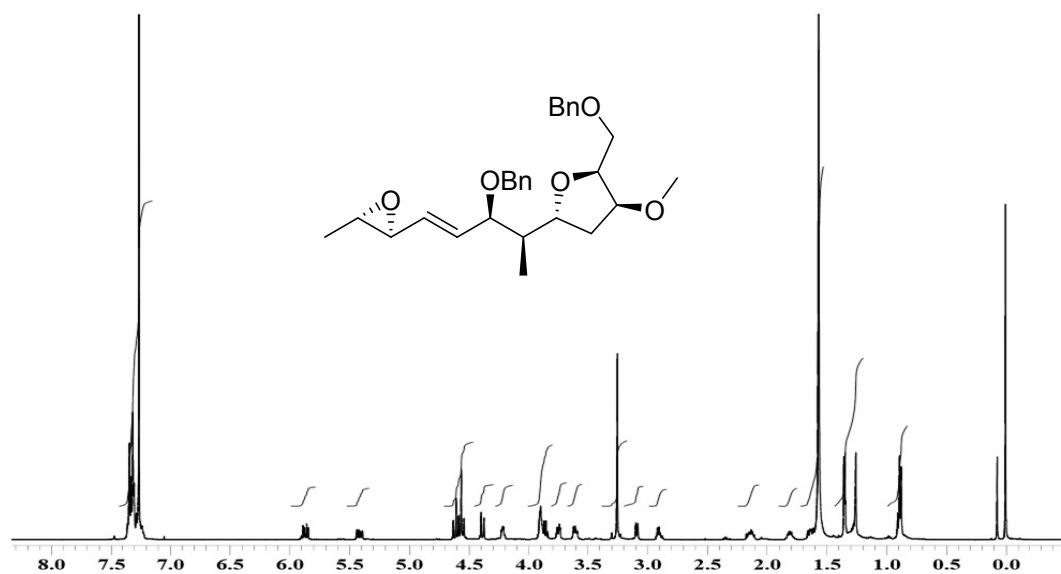

<sup>1</sup>H NMR OF COMPOUND 30 (500 MHz, CDCl<sub>3</sub>)

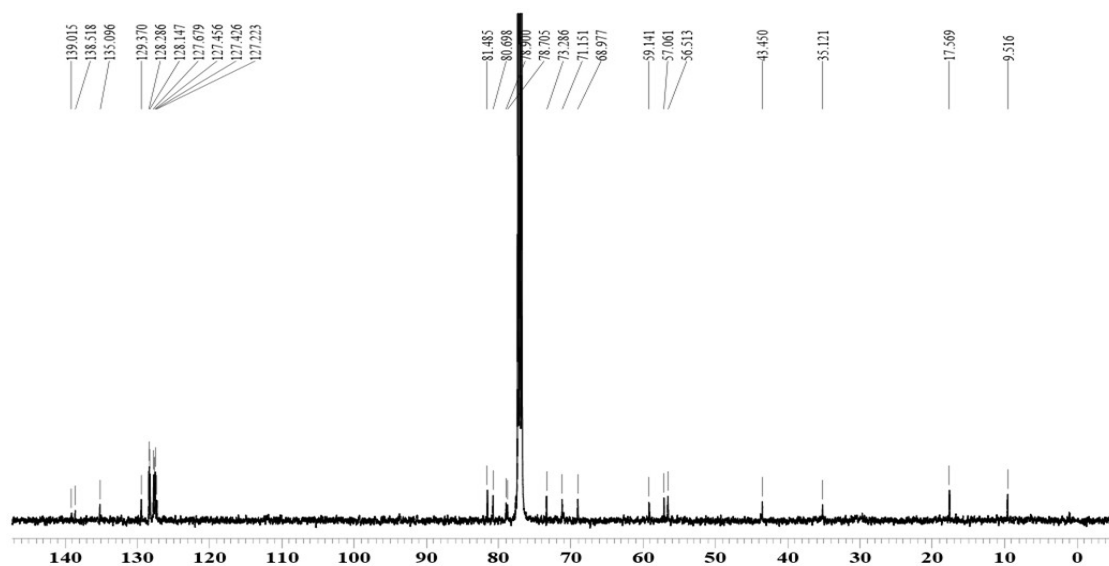

<sup>13</sup>C NMR OF COMPOUND 30 (125 MHz, CDCl<sub>3</sub>)

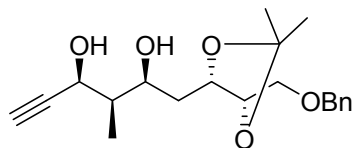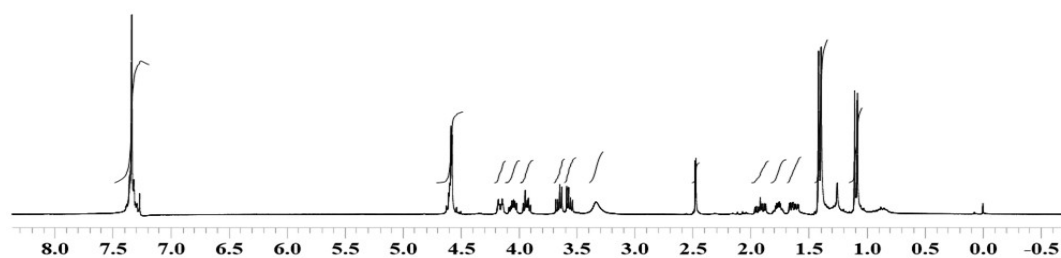

**$^1\text{H}$  NMR OF COMPOUND 24 (300 MHz,  $\text{CDCl}_3$ )**

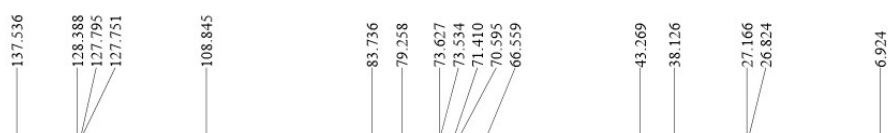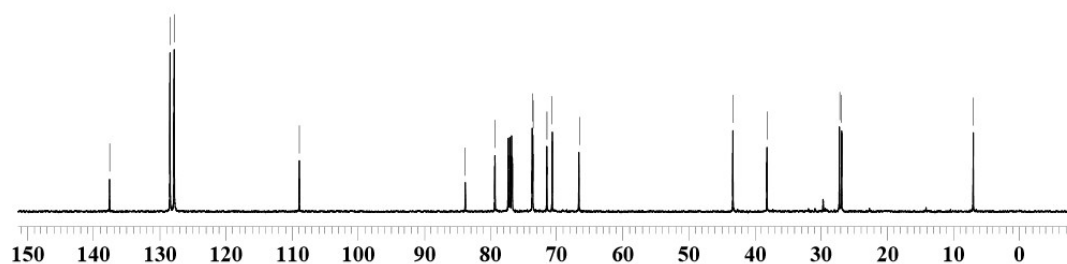

**$^{13}\text{C}$  NMR OF COMPOUND 24 (75 MHz,  $\text{CDCl}_3$ )**

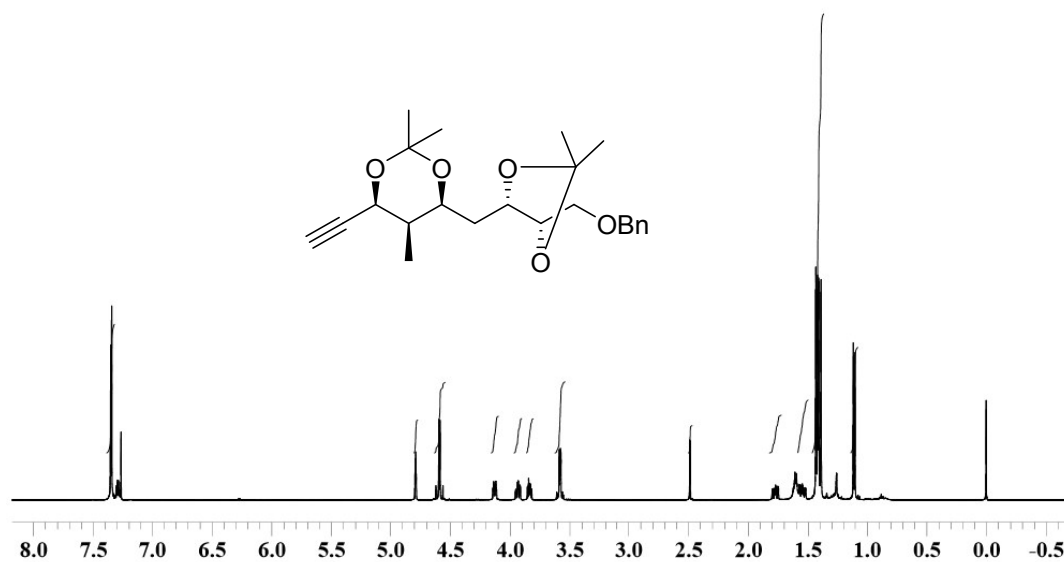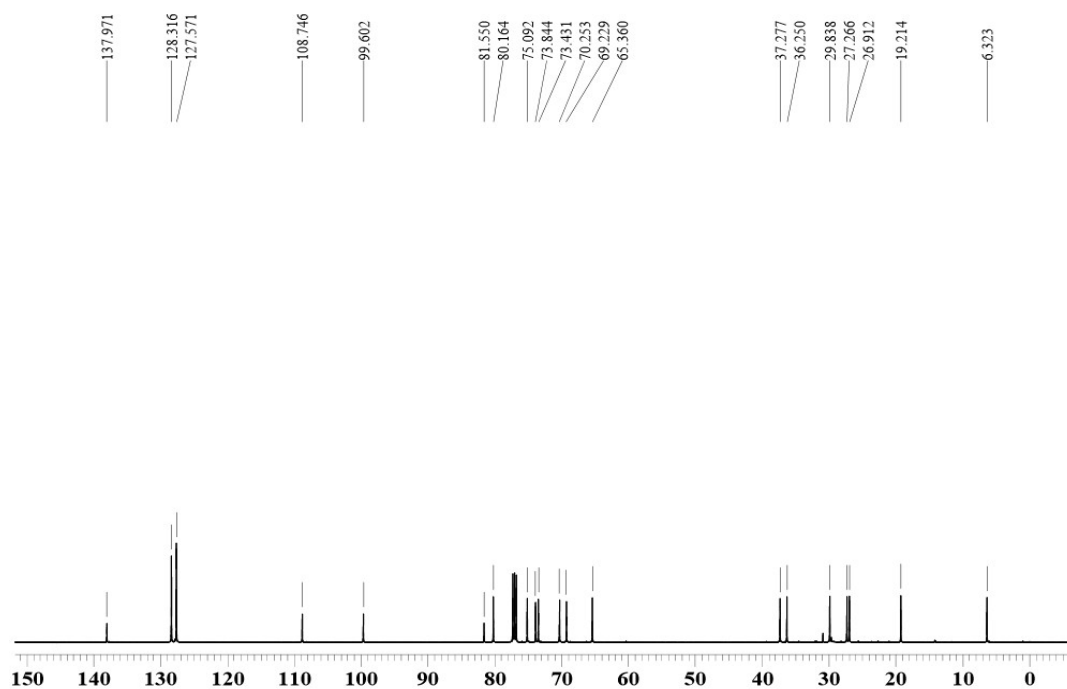

Supplement: c6ob01447j1.pdf [file c6ob01447j1.pdf]
